# Supplementary material for: Design of Lactococcus lactis Strains Producing Garvicin A and/or Garvicin Q, Either Alone or Together with Nisin A or Nisin Z and High Antimicrobial Activity against Lactococcus garvieae
Source: MDPI journal article supplement (doi:10.3390/foods12051063), 2023-03-02
Supplement: s1 [file s1]

**Table S1. Primers and PCR products used in this study.**

| Primer or PCR product | Nucleotide sequence (5'–3') or description <sup>a</sup>                                                                                                                                                     | PCR product amplified |
|-----------------------|-------------------------------------------------------------------------------------------------------------------------------------------------------------------------------------------------------------|-----------------------|
| <b>Primer</b>         |                                                                                                                                                                                                             |                       |
| GAR-F                 | CATAGAGCTCTGTAAG <b>GAGG</b>                                                                                                                                                                                | A, B, C, D            |
| GARAIM-R              | AAGTTAAGCTTGTATTACATAG                                                                                                                                                                                      | A, D, E               |
| GARQIM-R              | GTAAAGCTTGTATCAGTCTAAG                                                                                                                                                                                      | B, C                  |
| MGPJ-F                | TGGATTTTTGTGAGCTTGA                                                                                                                                                                                         |                       |
| MGPJ-R                | TTTGTGCTAGTACCGGTTG                                                                                                                                                                                         |                       |
| GARF-BSPHI            | ATCCACTCATCATGAAAAAAAAAGATTATCTC                                                                                                                                                                            | E                     |
| NZA1-F                | CCCTGACGAAAGTCGACGGCAATAGTTACC                                                                                                                                                                              | F, J, K               |
| NZA2-R                | CATGGTGAGTGCCTCCTTATAATTTATTTTG                                                                                                                                                                             | F                     |
| NZC1-F                | CTTTCTTTGAACCAAAATTAGAAAACCAAG                                                                                                                                                                              | G                     |
| NZC2-R                | AATAAGGGTAACTATTGCCGTCGACTTTTCG                                                                                                                                                                             | G, J, K               |
| QB1-F                 | CAAAATAAATTATAAGGAGGCACTCACCATGAAAAAAAAAGATTATCTCAG                                                                                                                                                         | H                     |
| QB2-R                 | CTTGGTTTTCTAATTTTGGTTCAAAGAAAGCTTGTATCAGTCTAAGTAAC                                                                                                                                                          | H                     |
| QAB1-F                | CAAAATAAATTATAAGGAGGCACTCACCATGAAAAAAAAAATCATTTCAG                                                                                                                                                          | I                     |
| QAB2-R                | CTTGGTTTTCTAATTTTGGTTCAAAGAAAGCTTGTATTACATTGAAAATG                                                                                                                                                          | I                     |
| NZPJ-F                | TGTCGATAACGCGAGCATAA                                                                                                                                                                                        |                       |
| NZPJ-R                | CAAAGCAACACGTGCTGTAA                                                                                                                                                                                        |                       |
| <b>PCR product</b>    |                                                                                                                                                                                                             |                       |
| A                     | 544-bp <i>SacI/HindIII</i> fragment containing the P <sub>32</sub> ribosome binding site and the SP <sub>usp45</sub> fused to mature <i>lgnA</i> and <i>lgnI</i>                                            |                       |
| B                     | 617-bp <i>SacI/HindIII</i> fragment containing the P <sub>32</sub> ribosome binding site and the SP <sub>usp45</sub> fused to mature <i>garQ</i> and <i>garI</i>                                            |                       |
| C                     | 1,139-bp <i>SacI/HindIII</i> fragment containing the P <sub>32</sub> ribosome binding site and the SP <sub>usp45</sub> fused to mature <i>lgnA</i> and <i>lgnI</i> , and mature <i>garQ</i> and <i>garI</i> |                       |
| D                     | 1,139-bp <i>SacI/HindIII</i> fragment containing the P <sub>32</sub> ribosome binding site and the SP <sub>usp45</sub> fused to mature <i>garQ</i> and <i>garI</i> , and mature <i>lgnA</i> and <i>lgnI</i> |                       |
| E                     | 524-bp <i>BspHI/HindIII</i> fragment containing the SP <sub>usp45</sub> fused to mature <i>lgnA</i> and <i>lgnI</i>                                                                                         |                       |
| F                     | 1,254-bp fragment of pNZ8048c (overlaps PCR product G)                                                                                                                                                      |                       |
| G                     | 2,089-bp fragment of pNZ8048c (overlaps PCR product F)                                                                                                                                                      |                       |
| H                     | 636-bp fragment containing the SP <sub>usp45</sub> fused to mature <i>garQ</i> and <i>garI</i> (overlaps PCR products F and G)                                                                              |                       |
| I                     | 1,158-bp fragment containing the SP <sub>usp45</sub> fused to mature <i>garQ</i> and <i>garI</i> , and mature <i>lgnA</i> and <i>lgnI</i> (overlaps PCR products F and G)                                   |                       |
| J                     | 3,888-bp circular fragment (corresponding to plasmid pNJFQI)                                                                                                                                                |                       |
| K                     | 4,410-bp circular fragment (corresponding to plasmid pNJFQIAI)                                                                                                                                              |                       |

<sup>a</sup> Cleavage sites for restriction enzymes are italicized; P<sub>32</sub> ribosome binding site is shown in bold.

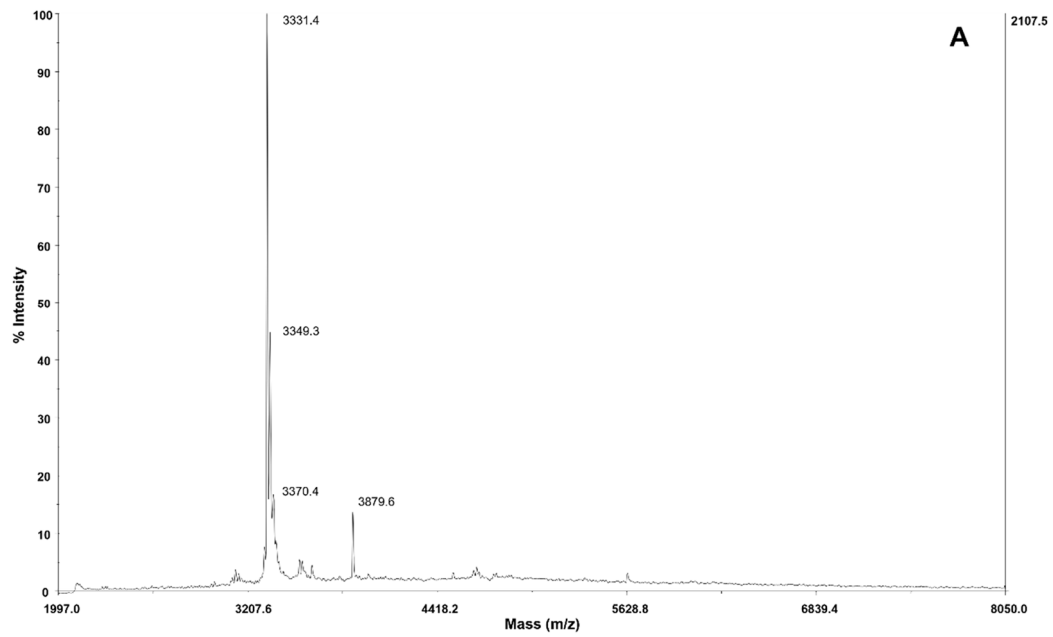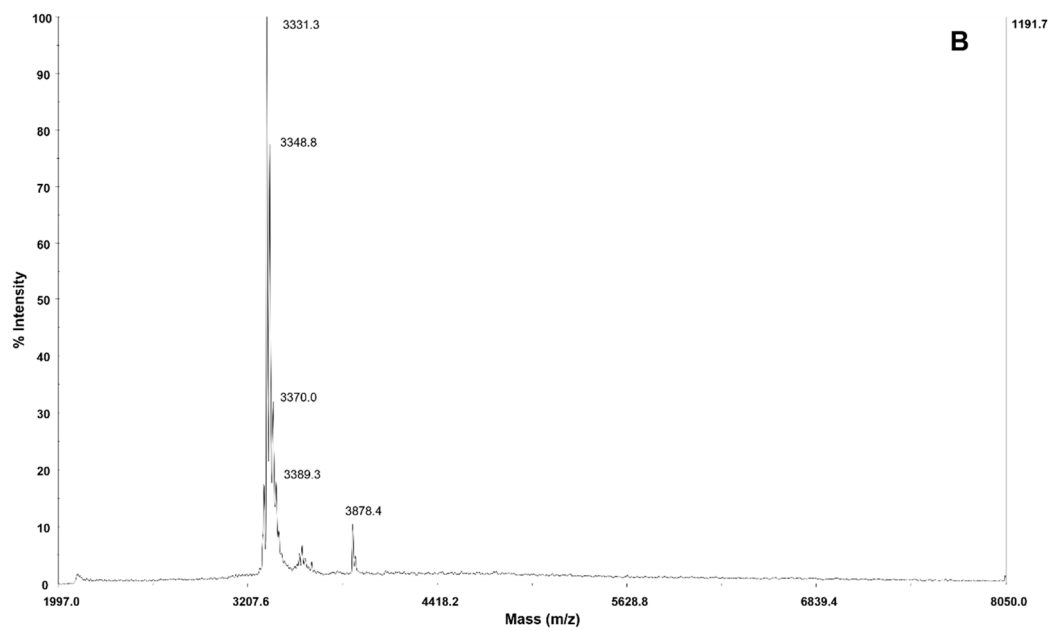

**Figure S1.** MALDI-TOF MS analysis of purified NisZ from *Lactococcus lactis* subsp. *cremoris* WA2-67 (pJFQI) (A), and *Lactococcus lactis* subsp. *cremoris* WA2-67 (pJFQIAI) (B). Numbers indicate the molecular mass in daltons of major peptide fragments.
